# Supplementary material for: An ultraweak mechanical stimuli actuated single electrode triboelectric nanogenerator with high energy conversion efficiency
Source: Royal Society of Chemistry journal article supplement (doi:10.1039/d2nr01530g), 2022-01-01
Supplement: d2nr01530g2.pdf [file d2nr01530g2.pdf]

**a**



 **FEP**

 **Copper**



**b**
