# Supplementary material for: An ultraweak mechanical stimuli actuated single electrode triboelectric nanogenerator with high energy conversion efficiency
Source: Royal Society of Chemistry journal article supplement (doi:10.1039/d2nr01530g), 2022-01-01
Supplement: d2nr01530g4.pdf [file d2nr01530g4.pdf]

## Supplementary Information for

# Ultraweak mechanical stimuli actuated single electrode triboelectric nanogenerator with high energy conversion efficiency

Yi Lv,<sup>ab</sup> Tianzhao Bu,<sup>ab</sup> Han Zhou,<sup>ac</sup> Guoxu Liu,<sup>a</sup> Yunkang Chen,<sup>ad</sup> Zhaozheng Wang,<sup>ab</sup> Xianpeng Fu,<sup>ab</sup> Yuan Lin,<sup>ac</sup> Jie Cao<sup>ae</sup> and Chi Zhang<sup>\*ab</sup>

\* Corresponding authors

<sup>a</sup> CAS Center for Excellence in Nanoscience, Beijing Key Laboratory of Micro-nano Energy and Sensor, Beijing Institute of Nanoenergy and Nanosystems, Chinese Academy of Sciences, Beijing 101400, China

<sup>b</sup> School of Nanoscience and Technology, University of Chinese Academy of Sciences, Beijing 100049, China

<sup>c</sup> School of Mechanical Engineering, Guangxi University, Nanning 530004, China

<sup>d</sup> Center on Nanoenergy Research, School of Physical Science and Technology, Guangxi University, Nanning 530004, China

<sup>e</sup> School of mechanical engineering, Jiangsu University, Jiangsu 212013, China

# These authors contributed equally to this work.

## Supporting figures

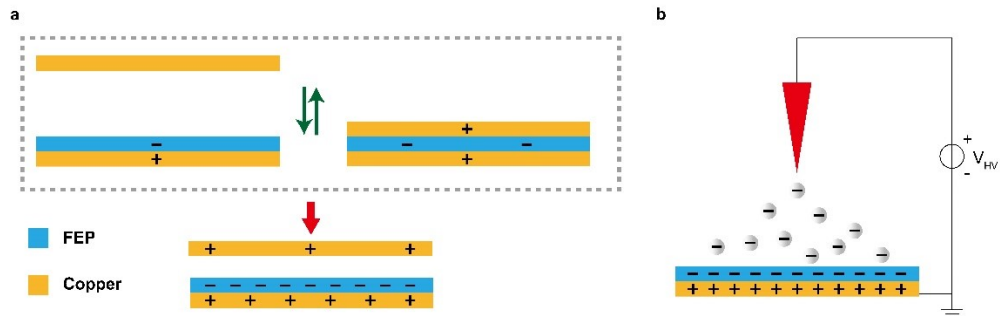

**Figure S1. Two methods of getting charged. (a) Friction electrification. (b) The charge injection.**
